# Supplementary material for: Molecular Trajectories Leading to the Alternative Fates of Duplicate Genes
Source: PLoS One. 2012 Jun 14;7(6):e38958. doi: 10.1371/journal.pone.0038958 (PMC3375281; doi:10.1371/journal.pone.0038958)
Supplement: Table S2 — Sequence identity between AvaI- and no AvaI- duplicate (p. 8). (XLSX) [file pone.0038958.s009.xlsx]

## Sheet: Sheet1
Table S2. Sequence identity between AvaI- and no AvaI- duplicate
1. Sequence identity between AvaI- and no AvaI-duplicate (human)
Human Fibroblast-2				Human Colon-2				Human Colon-3				hg19
Region	Similar	Total	%	Region	Similar	Total	%	Region	Similar	Total	%	Region	Similar	Total	%
Promoter	1039	1039	100	Promoter	1039	1039	100	Promoter	1039	1039	100	Promoter	1039	1039	100
exon 1	186	187	99.4652	exon 1	187	187	100	exon 1	187	187	100	exon 1	187	187	100
intron 1	632	638	99.0596	intron 1	631	638	98.9028	intron 1	633	638	99.2163	intron 1	637	638	99.8433
exon 2	87	88	98.8636	exon 2	88	88	100	exon 2	88	88	100	exon 2	87	88	98.8636
intron 2	1579	1592	99.1834	intron 2	1580	1592	99.2462	intron 2	1582	1592	99.3719	intron 2	1582	1593	99.3095
exon 3	151	151	100	exon 3	151	151	100	exon 3	151	151	100	exon 3	151	151	100
intron 3	89	92	96.7391	intron 3	92	92	100	intron 3	89	92	96.7391	intron 3	92	92	100
exon 4	171	173	98.8439	exon 4	171	173	98.8439	exon 4	171	173	98.8439	exon 4	172	174	98.8506
intron 4	350	352	99.4318	intron 4	351	352	99.7159	intron 4	352	352	100	intron 4	351	352	99.7159
exon 5	207	210	98.5714	exon 5	209	210	99.5238	exon 5	208	210	99.0476	exon 5	210	210	100
3'	538	538	100	3'	538	538	100	3'	537	538	99.8141	3'	538	538	100
total	5029	5060	99.3874	total	5037	5060	99.5455	total	5037	5060	99.5455	total	5046	5062	99.6839
exon	802	809	99.1347	exon	806	809	99.6292	exon	805	809	99.5056	exon	807	810	99.6296
intron	2650	2674	99.1025	intron	2654	2674	99.2521	intron	2656	2674	99.3269	intron	2662	2675	99.514
Amino-acid changes (human)
Human Fibroblast-2				Human Colon-2				Human Colon-3				hg19
Amino Acid #	AvaI	no AvaI	SYN/NON	Amino Acid #	AvaI	no AvaI	SYN/NON	Amino Acid #	AvaI	no AvaI	SYN/NON	Amino Acid #	AvaI	no AvaI	SYN/NON
20	S	F	NON	118	V	M	NON	118	V	M	NON	65	T	T	SYN
55	P	S	NON	129	E	K	NON	129	E	K	NON	121	P	P	SYN
118	V	M	NON	159	T	A	NON	149	K	E	NON	129	E	K	NON
129	E	K	NON	196	R	Stop	NON	181	Y	Y	SYN
148	D	G	NON					196	R	Stop	NON
181	Y	Y	SYN
196	R	Stop	NON
206	C	R	NON
2. Sequence identity between AvaI- and no AvaI-duplicate (chimpanzee)
Chimpanzee Fibroblast-2				Chimpanzee Fibroblast-3				Chimpanzee Fibroblast-4
Region	Similar	Total	%	Region	Similar	Total	%	Region	Similar	Total	%
Promoter	1015	1022	99.3151	Promoter	1017	1022	99.5108	Promoter	974	982	99.1853
exon 1	186	187	99.4652	exon 1	182	187	97.3262	exon 1	186	187	99.4652
intron 1	634	638	99.373	intron 1	635	638	99.5298	intron 1	633	638	99.2163
exon 2	88	88	100	exon 2	88	88	100	exon 2	88	88	100
intron 2	1551	1595	97.2414	intron 2	1538	1609	95.5873	intron 2	1514	1612	93.9206
exon 3	151	151	100	exon 3	150	151	99.3377	exon 3	151	151	100
intron 3	89	93	95.6989	intron 3	89	92	96.7391	intron 3	90	92	97.8261
exon 4	172	174	98.8506	exon 4	173	174	99.4253	exon 4	172	174	98.8506
intron 4	340	352	96.5909	intron 4	350	352	99.4318	intron 4	350	352	99.4318
exon 5	201	210	95.7143	exon 5	210	210	100	exon 5	210	210	100
Post	526	538	97.7695	Post	529	538	98.3271	Post	499	511	97.6517
Total	4953	5048	98.1181	Total	4961	5061	98.0241	Total	4867	4997	97.3984
exon	798	810	98.5185	exon	803	810	99.1358	exon	807	810	99.6296
intron	2614	2678	97.6102	intron	2612	2691	97.0643	intron	2587	2694	96.0282
Amino-acid changes (chimpanzee)
Chimpanzee Fibroblast-2				Chimpanzee Fibroblast-3				Chimpanzee Fibroblast-4
Amino Acid #	AvaI	no AvaI	SYN/NON	Amino Acid #	AvaI	no AvaI	SYN/NON	Amino Acid #	AvaI	no AvaI	SYN/NON
129	E	K	NON	22	K	DEL	3-bp deletion	129	E	K	NON
154	R	M	NON	113	P	P	SYN	154	R	M	NON
179	L	I	NON	129	E	K	NON
182	E	E	SYN
195	G	G	SYN
217	L	M	NON
220	A	G	NON
222	K	K	SYN
234	Q	Q	SYN
237	L	L	SYN

## Sheet: Sheet2
2. Sequence identity between AvaI- and no AvaI-duplicate (chimpanzee)
Chimpanzee Fibroblast-2				Chimpanzee Fibroblast-3				Chimpanzee Fibroblast-4
Region	Similar	Total	%	Region	Similar	Total	%	Region	Similar	Total	%
Promoter	1015	1022	99.3151	Promoter	1017	1022	99.5108	Promoter	974	982	99.1853
exon 1	186	187	99.4652	exon 1	182	187	97.3262	exon 1	186	187	99.4652
intron 1	634	638	99.373	intron 1	635	638	99.5298	intron 1	633	638	99.2163
exon 2	88	88	100	exon 2	88	88	100	exon 2	88	88	100
intron 2	1551	1595	97.2414	intron 2	1538	1609	95.5873	intron 2	1514	1612	93.9206
exon 3	151	151	100	exon 3	150	151	99.3377	exon 3	151	151	100
intron 3	89	93	95.6989	intron 3	89	92	96.7391	intron 3	90	92	97.8261
exon 4	172	174	98.8506	exon 4	173	174	99.4253	exon 4	172	174	98.8506
intron 4	340	352	96.5909	intron 4	350	352	99.4318	intron 4	350	352	99.4318
exon 5	201	210	95.7143	exon 5	210	210	100	exon 5	210	210	100
Post	526	538	97.7695	Post	529	538	98.3271	Post	499	511	97.6517
Total	4953	5048	98.1181	Total	4961	5061	98.0241	Total	4867	4997	97.3984
exon	798	810	98.5185	exon	803	810	99.1358	exon	807	810	99.6296
intron	2614	2678	97.6102	intron	2612	2691	97.0643	intron	2587	2694	96.0282
Amino-acid changes (chimpanzee)
Chimpanzee Fibroblast-2					Chimpanzee Fibroblast-3					Chimpanzee Fibroblast-4
Amino Acid #	AvaI	no AvaI	SYN/NON		Amino Acid #	AvaI	no AvaI	SYN/NON		Amino Acid #	AvaI	no AvaI	SYN/NON
129	E	K	NON		22	K	DEL	3-bp deletion		129	E	K	NON
154	R	M	NON		113	P	P	SYN		154	R	M	NON
179	L	I	NON		129	E	K	NON
182	E	E	SYN
195	G	G	SYN
217	L	M	NON
220	A	G	NON
222	K	K	SYN
234	Q	Q	SYN
237	L	L	SYN
