# Supplementary material for: Molecular Trajectories Leading to the Alternative Fates of Duplicate Genes
Source: PLoS One. 2012 Jun 14;7(6):e38958. doi: 10.1371/journal.pone.0038958 (PMC3375281; doi:10.1371/journal.pone.0038958)
Supplement: Table S3 — Primer list (p. 9). (XLS) [file pone.0038958.s010.xls]

## Sheet: Sheet1
Table S3. Primer list
Experiment	Figure	Primer Name	Seq 5' to 3'
Genotyping Southern probe	Figure 1a	1kbIR28-26352F	CAAGAGGCTACACAGGCAGATGTC
		1kbIR28-26980R	GGGCAGAGGAACGGAAACAG
Copy # Southern GSTT2	Figure 1c	gIR28-39785F	GCTCTGAACGAACCCTCAGATGTC
		gIR28-40339R	TCTTCTTGGCGAAGATGTAGACG
Copy # Southern BTBD11	Figure 1c	BTBD11-19851F	GATCACTCGTGGGAAGCATAGTG
		BTBD11-20367R	GGAGGAGTCAGAGAGAGAAAAAGGC
GSTT2 Northern Probe	Figure 1c, 2c, 2d, S4	GSTT2cDNA31F	AGAGCTGTTTCTTGACCTGGTGTC
GSTT2 full length cDNA Sequencing		GSTT2cDNA938R	GGTTATGTATGCTGCACCTGAGG
DDT Northern Probe	Figure 1c	DDT_cDNA_L	CTGAGGAGCTGTTTCCGTTC
		DDT_cDNA_R	AATGTTGCATGCGGGATAAT
β-Actin Northern Probe	Figure 1c	ACTB_cDNA_L	AGAGCTACGAGCTGCCTGAC
		ACTB_cDNA_R	CACCTTCACCGTTCCAGTTT
GSTT2 Genotyping	Sup Figure 1	GSTT2_B	CCTTCTGAAATGGAGCCTTTG
		6857	TGCCTCCCCTGCCTTATTTC
		6858	CACTCAACACAGTAGCCTCATCGTG
Real Time PCR	Figure 1d	RPL32F	GCCAGATCTTGATGCCCAAC
		RPL32R	CGTGCACATGAGCTGCCTAC
	Figure 1d	GSTT2_2RT_F	CGCTCAAGGATGGTGATTTC
		GSTT2_2RT_R	AGGTACTCATGAACACGGGC
GSTT2 Promoter	Figure 3a, 3d	GSTT2pro_up	GGGATTCAGGGAGAAGAAAGGAG
		GSTT2pro_down	CCACCTTTGACCAAATCCACG
GSTT2 methylation	Sup Figure 3	GSTT2CpG327FBi	ATGTAGATGGTGTGGTTGGGTTGGGAT
		GSTT2CpG1158RBi	TTCCCAAACAATCATTCCTACCTCCCA
		GSTT2CpG335FBi	GGTGTGGTTGGGTTGGGATATTAGGTT
		GSTT2CpG1005RBi	CCACAACTACAAACTCCCTACCCCCATCCTA
Stop Codon/AvaI Sequencing	Sup Figure 4	GSTT2int3_F	GGAGAGCCATCTGGAGAGTGATTG
		GSTT2ex5_R	CGAAGCAGCATAGCCTGATAGG
GSTT2 Promoter (Luciferase)	Figure 3b, Sup Figure 5	GSTT2reportF	AGATCTCCCTGTTATCACTCCCTTTCTCTG
		GsTT2reportR	AAGCTTGGGCGGCAAGGACAGCGGGGATGGC
GSTT2_5KB	Figure 2c, 2d, 3d	GSTT2hg19_1316F	CCTGTTATCACTCCCTTTCTCTGAGTC
		GSTT2hg19_6309R	GCCCTGTGAAACATCGCCTATATC
	Figure 2c, 2d, 3d, 4b, 4c, 4d, S4	GSTT2hg19_1276F	CCGTGAGAGTAACTGGGATTGC
		GSTT2hg19_6336R	TTCCTAGACTTCAAAGACCGTTGC
	Sequencing Primers	IR28out(4179-4198)	TGGGCAGAAGTATCAGAGAC
		IR28in(703-721)	ATCCCGAAAAGCAGACCTG
		IR28outrd3	CGAGTCTCCTCCTGTCTTTG
		IR28inrd3	AGAGATGGGAAGAGATGAGC
		M13 -20	TGTAAAACGACGGCCAGT
		M13 Reverse	CAGGAAACAGCTATGAC
GSTT2_AvaI (DNA)	Figure 2a, 2b	GSTT2Apa1genoF	CAGTTAGGGGTAAATGCCTGGTG
	Figure 2a, 4a	PtGSTT2Apa1genoF	CAGYTAGGGGTAAATGCCTGGTRC
	Figure 2a, 2b, 4a	GSTT2Apa1genoR	TCATGGGTGTGACACGAAGAGG
GSTT2_Ava1 (cDNA)	Figure 2a, 2b	GSTT2cDNA179-200	TGGTCAAAGGGCAGCACAAGAG
	Figure 2a, 4a	PtGSTT2cDNA179-200	TTATCAAAGGGCAGCACAAGAG
	Figure 2a, 2b, 4a	GSTT2cDNA791-770	CGAAGCAGCATAGCCTGATAGG
GSTT2_17bp Promoter	Figure 3c	GSTT2ProAlleleF	CCCATCCTGTGCACGAAGTG
		GSTT2ProAlleleR	GCCCTGACCCAGAAACGACTG
IR28 Boundary	Sup Figure 2	IR28_Left_F	TTTACCAGCCACCTTCCAGCAG
		IR28_Left_R	TGTTGCCAAGCCACGAACTC
	Sup Figure 2	IR28_Right_F	TTGCCTTCCTGAGTGCCACTAC
		IR28_Right_R	AGCTGGGATTACAGGTGTGTGC
	Sup Figure 2	IR28_31719F	CATCAGCTCCTTGGCTAATACCAC
		IR28_32442R	TTCTGGTTTCCTCTGGGGATTC
	Sup Figure 2	IR28_29026F	TTCTGGTTTCCTCTGGGGATTC
		IR28_29842R	AACTCAGATTATTGCAGCCTCGAC
